# Supplementary material for: The motor activity of DNA2 functions as an ssDNA translocase to promote DNA end resection
Source: PubMed Central journal article supplement — Genes Dev. 2017 Mar 1;31(5):493–502. doi: 10.1101/gad.295196.116 (PMC5393063; doi:10.1101/gad.295196.116), 2017-03-01
Supplement: supp_gad.295196.116_Supplemental_Fig_S2.pdf [file supp_gad.295196.116_Supplemental_Fig_S2.pdf]

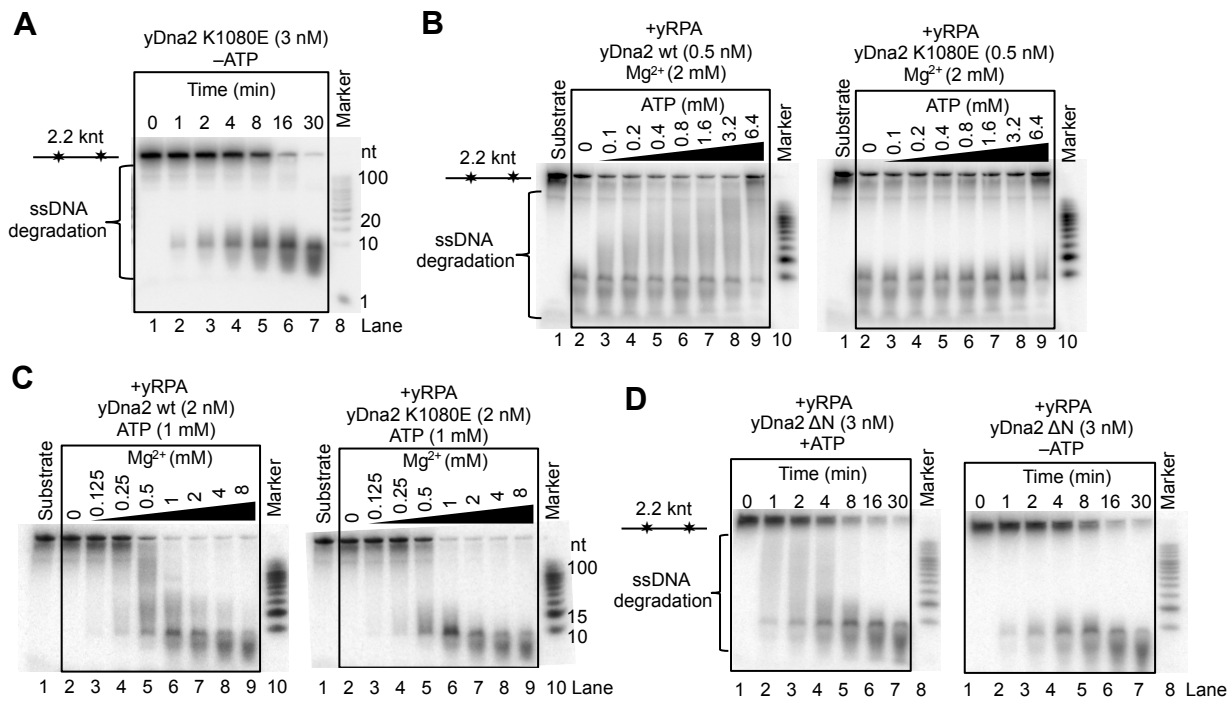

**Figure S2.**

Influence of ATP and magnesium on the Dna2 motor activity in ssDNA degradation. (A) Degradation kinetics of randomly <sup>32</sup>P-labeled ssDNA by yDna2 K1080E in the absence of ATP. Shown is a representative denaturing 20% polyacrylamide gel. (B) The effect of ATP concentration on ssDNA degradation by wt and helicase-deficient K1080E yDna2. (C) The effect of magnesium concentration on ssDNA degradation by wt and helicase-deficient K1080E yDna2. (D) The effect of ATP on ssDNA degradation by yDna2 ΔN.
