# Supplementary material for: The motor activity of DNA2 functions as an ssDNA translocase to promote DNA end resection
Source: PubMed Central journal article supplement — Genes Dev. 2017 Mar 1;31(5):493–502. doi: 10.1101/gad.295196.116 (PMC5393063; doi:10.1101/gad.295196.116), 2017-03-01
Supplement: supp_gad.295196.116_Supplemental_Table_S1.pdf [file supp_gad.295196.116_Supplemental_Table_S1.pdf]

**Table S1.**

Primer sequences used to prepare DNA probes for hybridization.

|   |             |                                                              |
|---|-------------|--------------------------------------------------------------|
| 1 | MAT_0kb_1   | 5' CTTGATTGTTTGCTTGAGTCTG                                    |
|   | MAT_0kb_2   | 5' ACTAACAATACTTCAGTTTA                                      |
| 2 | BUD5_3kb_1  | 5' CCAGTTATCGTCCTACGTTC                                      |
|   | BUD5_3kb_2  | 5' GGTAAGCCTTGGAACCTTAG                                      |
| 3 | SNT1_10kb_1 | 5' CTATCGATGGCTCTATAAGAC                                     |
|   | SNT1_10kb_2 | 5' CACGACTTATTGGACTAGTG                                      |
| 4 | FEN2_28kb_1 | 5' CACCAATGCATATATATCCG                                      |
|   | FEN2_28kb_2 | 5' GAATAGTCGACCAGTCTAAC                                      |
| 5 | Ctrl_TRA1_1 | 5'- GTC CTA ATA CGA CTT TTC AAA TTG TCC TTT ATG TCC<br>GTC A |
|   | Ctrl_TRA1_2 | 5'- ATA CTT GTA AGC ACT CTT CCT GTA GTG AAT ATC ACT<br>TTT G |
