# Supplementary figures and images for: The motor activity of DNA2 functions as an ssDNA translocase to promote DNA end resection
Source: PubMed Central journal article supplement — Genes Dev. 2017 Mar 1;31(5):493–502. doi: 10.1101/gad.295196.116 (PMC5393063; doi:10.1101/gad.295196.116), 2017-03-01

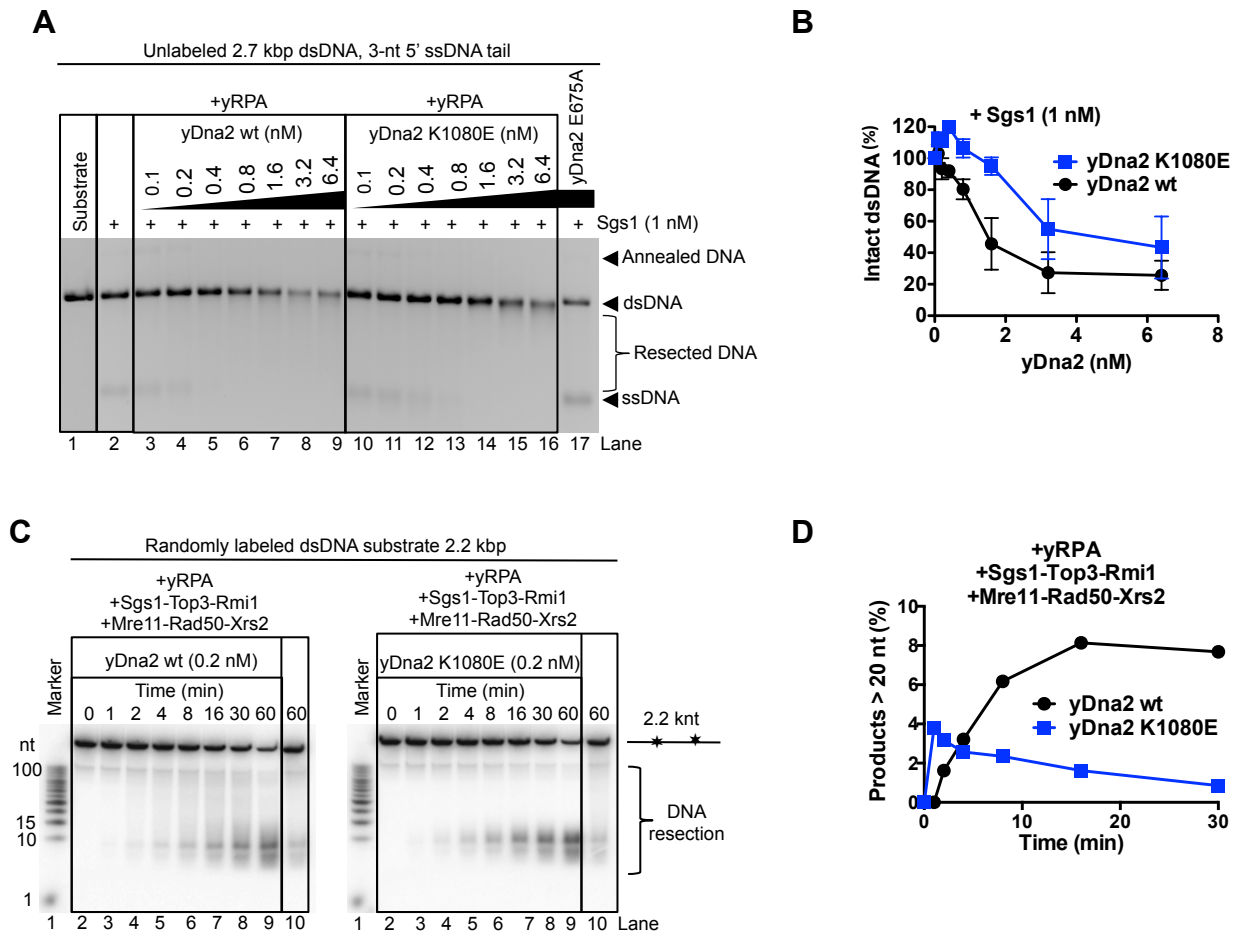

Supplement: supp_gad.295196.116_Supplemental_Fig_S5.pdf [file supp_gad.295196.116_Supplemental_Fig_S5.pdf]
